# Supplementary material
Source: MDPI journal article supplement (https://www.mdpi.com/2311-7524/8/10/975)
Supplement: s1 [file s1]

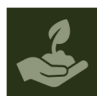

# Oriental Strawberry Metabolites: LC-MS Profiling, Antioxidant Potential and Postharvest Changes of *Fragaria orientalis* Fruits

Daniil N. Olennikov <sup>1,\*</sup>, Maria T. Khandy <sup>2</sup>, Nadezhda K. Chirikova <sup>3</sup>

<sup>1</sup> Laboratory of Biomedical Research, Institute of General and Experimental Biology, Siberian Division, Russian Academy of Science, 6 Sakhyanovoy Street, 670047 Ulan-Ude, Russia

<sup>2</sup> Laboratory of Biomedical Cell Technologies, Centre for Genomic and Regenerative Medicine, Institute of Life Sciences and Biomedicine, Far Eastern Federal University, Russky Island, 10 Ayaks, 690922 Vladivostok, Russia

<sup>3</sup> Department of Biology, Institute of Natural Sciences, North-Eastern Federal University, 58 Belinsky Street, 677027 Yakutsk, Russia

\* Correspondence: olennikovdn@mail.ru; Tel.: +8-902-160-06-27

## Content

**Table S1.** *Fragaria* fruit sample description.

**Table S2.** Reference standards used for the qualitative and quantitative analysis by HPLC-DAD-ESI-tQ-MS assays.

**Table S3.** Regression equations, correlation coefficients, standard deviation, limits of detection, limits of quantification and linear ranges for 17 reference standards.

**Table S4.** Nutritional and chemical composition of wild and cultivated samples of *F. orientalis* fruits.

**Table S5.** Demographic information of participants of *Fragaria* fruits sensory evaluation.

**Table S6.** Sensory evaluation data of *Fragaria* fruits.

**Table S7.** Chromatographic, ultraviolet and mass-spectrometric data of compounds 1–65 found in *F. orientalis* fruits.

**Table S8.** Quantitative content of 21 compounds in *Fragaria* fruits.

**Table S1.** *Fragaria* fruit sample description.

| No                                            | Collection Place                                           | Collection Date | Coordinates                   | Voucher Specimens No  | Samples weight, g                                                                                                                                                      |
|-----------------------------------------------|------------------------------------------------------------|-----------------|-------------------------------|-----------------------|------------------------------------------------------------------------------------------------------------------------------------------------------------------------|
| <i>Fragaria orientalis</i> wild samples       |                                                            |                 |                               |                       |                                                                                                                                                                        |
| YW-01                                         | Yakutia Republic, Namskii Ulus, Zhatai, Tuimaada valley    | 15.VII.2015     | 62°20'38.9"N<br>129°29'59.0"E | YAK/ROS-0715/12-095   | 80; 85; 85; 110; 120                                                                                                                                                   |
| YW-02                                         | Yakutia Republic, Gornii Ulus, Berdigestyakh               | 17.VII.2016     | 62°00'31.5"N<br>126°45'21.9"E | YAK/ROS-0716/18-014   | 70; 95; 120; 120; 140                                                                                                                                                  |
| YW-03                                         | Yakutia Republic, Kobyaiskii Ulus, Kobyai                  | 18.VII.2016     | 63°28'28.0"N<br>126°31'15.3"E | YAK/ROS-0716/18-027   | 100; 145; 150; 160; 175                                                                                                                                                |
| YW-04                                         | Yakutia Republic, Vilyiskii Ulus, Lyokyochoyon             | 10.VII.2017     | 63°01'39.2"N<br>123°43'30.0"E | YAK/ROS-0717/23-108   | 85; 90; 105; 110; 140                                                                                                                                                  |
| YW-05                                         | Yakutia Republic, Vilyiskii Ulus, Khampa                   | 12.VII.2017     | 63°46'34.5"N<br>123°10'34.6"E | YAK/ROS-0717/23-112   | 30; 55; 60; 60; 70                                                                                                                                                     |
| YW-06                                         | Yakutia Republic, Vilyiskii Ulus, Kysyl-Syr                | 15.VII.2017     | 64°00'22.4"N<br>122°47'50.6"E | YAK/ROS-0717/23-114   | 50; 50; 65; 70; 85                                                                                                                                                     |
| YW-07                                         | Yakutia Republic, Vekhnevilyiskii Ulus, Lippe-Atakh        | 11.VII.2018     | 63°44'50.5"N<br>120°16'33.0"E | YAK/ROS-0718/09-072   | 35; 50; 70; 75; 80                                                                                                                                                     |
| YW-08                                         | Yakutia Republic, Vekhnevilyiskii Ulus, Kubyainde          | 17.VII.2018     | 64°32'41.7"N<br>119°57'44.2"E | YAK/ROS-0718/09-093   | 60; 70; 100; 110; 110                                                                                                                                                  |
| YW-09                                         | Yakutia Republic, Megino-Kangalasskii Ulus, Maia           | 14.VII.2019     | 61°37'54.8"N<br>130°22'48.1"E | YAK/ROS-0719/27-108   | 120; 145; 150; 160; 160                                                                                                                                                |
| YW-10                                         | Yakutia Republic, Megino-Kangalasskii Ulus, Khorobut       | 12.VII.2020     | 61°54'00.6"N<br>130°44'42.5"E | YAK/ROS-0720/14-073   | 90; 90; 110; 110; 150                                                                                                                                                  |
| BW-01                                         | Buryatia Republic, Pribaikalskii District, Ilyinka         | 10.VII.2015     | 52°04'24.8"N<br>107°19'06.0"E | BUR/ROS-0715/21-106   | 140; 150; 170; 180; 180                                                                                                                                                |
| BW-02                                         | Buryatia Republic, Pribaikalskii District, Turuntaevo      | 14.VII.2015     | 52°17'08.7"N<br>107°37'53.2"E | BUR/ROS-0715/22-115   | 180; 210; 220; 250; 260                                                                                                                                                |
| BW-03                                         | Buryatia Republic, Kabanskii District, Sukhaya             | 17.VII.2016     | 52°27'48.6"N<br>107°06'34.5"E | BUR/ROS-0716/18-076   | 75; 80; 95; 95; 100                                                                                                                                                    |
| BW-04                                         | Buryatia Republic, Barguzinskii District, Maximikha        | 14.VII.2017     | 53°14'11.1"N<br>108°49'04.7"E | BUR/ROS-0717/27-063   | 90; 100; 105; 120; 120                                                                                                                                                 |
| BW-05                                         | Buryatia Republic, Kabanskii District, Tankhoy             | 18.VII.2018     | 51°29'20.5"N<br>105°03'18.5"E | BUR/ROS-0718/37-114   | 110; 140; 160; 180; 190                                                                                                                                                |
| BW-06                                         | Buryatia Republic, Tarbagataiskii District, Tarbagatai     | 14.VII.2019     | 51°35'04.9"N<br>107°36'53.9"E | BUR/ROS-0719/14-051   | 50; 60; 60; 75; 90                                                                                                                                                     |
| BW-07                                         | Buryatia Republic, Mukhorshibirskii District, Mukhorshibir | 17.VII.2020     | 51°01'04.9"N<br>107°53'22.6"E | BUR/ROS-0720/27-083   | 140; 160; 180; 210; 240                                                                                                                                                |
| BW-08                                         | Buryatia Republic, Mukhorshibirskii District, Podlopatki   | 20.VII.2020     | 50°54'13.9"N<br>107°09'12.7"E | BUR/ROS-0720/29-087   | 100; 120; 140; 140; 150                                                                                                                                                |
| BW-09                                         | Buryatia Republic, Bichurskii District, Elan               | 16.VII.2021     | 50°29'35.8"N<br>107°22'04.0"E | BUR/ROS-0721/08-016   | 140; 160; 190; 200; 210                                                                                                                                                |
| BW-10                                         | Buryatia Republic, Mukhorshibirskii District, Nikolsk      | 14.VII.2022     | 51°07'17.7"N<br>108°22'22.9"E | BUR/ROS-0722/11-073   | 60; 70; 80; 80; 90                                                                                                                                                     |
| <i>Fragaria orientalis</i> cultivated samples |                                                            |                 |                               |                       |                                                                                                                                                                        |
| BC-01                                         | Buryatia Republic, Buryat Fruit and Plant Nursery, Field 1 | 1.VII.2016      | 51°52'01.1"N<br>107°40'38.6"E | BUR-C/ROS-0716/07-012 | 5 × 100; for post-harvest storage experiments 10 × 200 (storage of cold and room temp.); 8 × 500 (storage of frozen fruits); 4 × 1000 (storage of freeze dried fruits) |

|                                             |                                                            |             |                               |                       |                         |
|---------------------------------------------|------------------------------------------------------------|-------------|-------------------------------|-----------------------|-------------------------|
| BC-02                                       | Buryatia Republic, Buryat Fruit and Plant Nursery, Field 1 | 2.VII.2017  | 51°52'01.1"N<br>107°40'38.6"E | BUR-C/ROS-0717/04-014 | 5 × 100                 |
| BC-03                                       | Buryatia Republic, Buryat Fruit and Plant Nursery, Field 2 | 4.VII.2017  | 51°52'01.1"N<br>107°40'38.6"E | BUR-C/ROS-0717/04-016 | 5 × 100                 |
| BC-04                                       | Buryatia Republic, Buryat Fruit and Plant Nursery, Field 1 | 2.VII.2018  | 51°52'01.1"N<br>107°40'38.6"E | BUR-C/ROS-0718/07-021 | 5 × 100                 |
| BC-05                                       | Buryatia Republic, Buryat Fruit and Plant Nursery, Field 2 | 3.VII.2018  | 51°52'01.1"N<br>107°40'38.6"E | BUR-C/ROS-0718/07-022 | 5 × 100                 |
| BC-06                                       | Buryatia Republic, Buryat Fruit and Plant Nursery, Field 1 | 3.VII.2019  | 51°52'01.1"N<br>107°40'38.6"E | BUR-C/ROS-0719/05-020 | 5 × 100                 |
| BC-07                                       | Buryatia Republic, Buryat Fruit and Plant Nursery, Field 2 | 5.VII.2019  | 51°52'01.1"N<br>107°40'38.6"E | BUR-C/ROS-0719/05-025 | 5 × 100                 |
| BC-08                                       | Buryatia Republic, Buryat Fruit and Plant Nursery, Field 2 | 1.VII.2020  | 51°52'01.1"N<br>107°40'38.6"E | BUR-C/ROS-0720/14-021 | 5 × 100                 |
| BC-09                                       | Buryatia Republic, Buryat Fruit and Plant Nursery, Field 2 | 2.VII.2021  | 51°52'01.1"N<br>107°40'38.6"E | BUR-C/ROS-0721/10-018 | 5 × 100                 |
| BC-10                                       | Buryatia Republic, Buryat Fruit and Plant Nursery, Field 3 | 1.VII.2021  | 51°52'01.1"N<br>107°40'38.6"E | BUR-C/ROS-0722/14-009 | 5 × 100                 |
| <i>Fragaria viridis</i> wild samples        |                                                            |             |                               |                       |                         |
| IV-01                                       | Irkutsk Region, Sludyanskii District, Kultuk               | 15.VII.2018 | 51°42'21.5"N<br>103°36'05.5"E | IRK/ROS-0718/03-011   | 50; 80; 80; 90; 90      |
| IV-02                                       | Irkutsk Region, Irkutskii District, Nikola                 | 20.VII.2019 | 51°56'00.5"N<br>104°54'51.8"E | IRK/ROS-0719/07-017   | 110; 120; 120; 140; 140 |
| IV-03                                       | Irkutsk Region, Irkutskii District, Goloustnoye            | 22.VII.2019 | 52°01'53.7"N<br>105°19'15.2"E | IRK/ROS-0719/07-019   | 70; 70; 80; 90; 90      |
| IV-04                                       | Irkutsk Region, Bratskii District, Vikhorevka              | 25.VII.2020 | 56°20'36.1"N<br>100°57'13.7"E | IRK/ROS-0720/14-077   | 50; 50; 60; 70; 70      |
| IV-05                                       | Irkutsk Region, Bratskii District, Kezhemskii              | 27.VII.2020 | 56°31'32.1"N<br>102°21'36.2"E | IRK/ROS-0720/14-081   | 100; 110; 110; 120; 120 |
| IV-06                                       | Irkutsk Region, Chunkskii District, Pitaeva                | 25.VII.2021 | 55°57'28.2"N<br>99°39'26.8"E  | IRK/ROS-0721/09-053   | 70; 70; 80; 90; 100     |
| <i>Fragaria vesca</i> wild samples          |                                                            |             |                               |                       |                         |
| IE-01                                       | Irkutsk Region, Kazachinsko-Lenskii District, Korotkovo    | 20.VII.2020 | 56°39'53.0"N<br>107°59'06.2"E | IRK/ROS-0720/14-014   | 100; 110; 110; 115; 120 |
| IE-02                                       | Irkutsk Region, Ust-Kutskii District, Ust-Kut              | 25.VII.2020 | 56°43'08.4"N<br>105°47'55.6"E | IRK/ROS-0720/14-019   | 70; 80; 80; 90; 90      |
| IE-03                                       | Irkutsk Region, Ust-Kutskii District, Mingan               | 29.VII.2020 | 56°59'00.0"N<br>105°50'33.8"E | IRK/ROS-0720/14-023   | 110; 110; 140; 140; 150 |
| IE-04                                       | Irkutsk Region, Ust-Udinskii District, Vidim               | 20.VII.2021 | 56°16'34.8"N<br>103°12'21.7"E | IRK/ROS-0721/18-072   | 50; 60; 60; 70; 70      |
| IE-05                                       | Irkutsk Region, Bratskii District, Bratsk                  | 27.VII.2021 | 56°27'10.1"N<br>101°24'15.3"E | IRK/ROS-0721/20-096   | 100; 120; 120; 125; 125 |
| BE-01                                       | Buryatia Republic, Kyakhtinskii District, Kyakhta          | 18.VII.2020 | 50°26'46.9"N<br>106°16'16.3"E | BUR/ROS-0720/18-021   | 90; 90; 100; 100; 110   |
| BE-02                                       | Buryatia Republic, Tunkinskii District, Mondy              | 21.VII.2021 | 51°38'28.5"N<br>101°07'46.6"E | BUR/ROS-0721/12-035   | 80; 90; 110; 115; 120   |
| BE-03                                       | Buryatia Republic, Okinskii District, Sorok                | 25.VII.2022 | 52°17'19.1"N<br>100°11'50.5"E | BUR/ROS-0722/22-071   | 100; 110; 110; 140; 140 |
| <i>Fragaria ananassa</i> cultivated samples |                                                            |             |                               |                       |                         |
| BA-01                                       | Buryatia Republic, Buryat Fruit and Plant Nursery, Field 6 | 7.VII.2019  | 51°52'01.1"N<br>107°40'38.6"E | BUR-C/ROS-0719/09-020 | 5 × 100                 |
| BA-02                                       | Buryatia Republic, Buryat Fruit and Plant Nursery, Field 6 | 10.VII.2020 | 51°52'01.1"N<br>107°40'38.6"E | BUR-C/ROS-0720/08-028 | 5 × 100                 |
| BA-03                                       | Buryatia Republic, Buryat Fruit and Plant Nursery, Field 6 | 5.VII.2021  | 51°52'01.1"N<br>107°40'38.6"E | BUR-C/ROS-0721/11-022 | 5 × 100                 |

**Table S2.** Reference standards used for the qualitative and quantitative analysis by HPLC-DAD-ESI-tQ-MS assays.

| No <sup>a</sup> | Compound                                         | Standard <sup>a</sup>                                              | Purity, (≥)<br>% | Manufacturer<br>(Cat. no) <sup>b</sup> |
|-----------------|--------------------------------------------------|--------------------------------------------------------------------|------------------|----------------------------------------|
| 1               | Hexosyl-hexose                                   | Sucrose <sup>A</sup>                                               | 99               | Sigma (S7903)                          |
| 2               | Hexose                                           | Glucose <sup>A</sup>                                               | 99               | Sigma (47739)                          |
| 3               | Citric acid                                      | Citric acid <sup>A</sup>                                           | 99               | Sigma (251275)                         |
| 4               | Malic acid                                       | Malic acid <sup>A</sup>                                            | 99               | Sigma (W265501)                        |
| 5               | Tartaric acid                                    | Tartaric acid <sup>A</sup>                                         | 99               | Sigma (W304401)                        |
| 6               | Fumaric acid                                     | Fumaric acid <sup>A</sup>                                          | 99               | Sigma (47910)                          |
| 7               | Ascorbic acid                                    | Ascorbic acid <sup>A,B</sup>                                       | 99               | Sigma (255564)                         |
| 8               | 1-O-Galloyl glucose                              | 1-O-Galloyl glucose <sup>A</sup>                                   | 90               | Sigma (69288)                          |
| 9               | Galloyl hexose                                   | 1-O-Galloyl glucose <sup>A</sup>                                   | 90               | Sigma (69288)                          |
| 10              | Gallic acid                                      | Gallic acid <sup>A,B</sup>                                         | 97               | Sigma (G7384)                          |
| 11              | Pedunculagin                                     | Pedunculagin <sup>A</sup>                                          | 95               | Toronto (P354070)                      |
| 12              | 4-O-Caffeoylquinic acid                          | 4-O-Caffeoylquinic acid <sup>A</sup>                               | 98               | Sigma (65969)                          |
| 13              | Strictinin                                       | Strictinin <sup>A,B</sup>                                          | 98               | Funakoshi (NH026102)                   |
| 14              | Procyanidin B2                                   | Procyanidin B2 <sup>A,B</sup>                                      | 90               | Sigma (PHL89552)                       |
| 15              | Pedunculagin isomer                              | Pedunculagin <sup>A</sup>                                          | 95               | Toronto (P354070)                      |
| 16              | 5-O-Caffeoylquinic acid                          | 5-O-Caffeoylquinic acid <sup>A</sup>                               | 95               | Sigma (C3878)                          |
| 17              | Procyanidin B4                                   | Procyanidin B4 <sup>A</sup>                                        | 98               | ChemFaces (CFN91171)                   |
| 18              | Strictinin isomer                                | Strictinin <sup>A</sup>                                            | 98               | Funakoshi (NH026102)                   |
| 19              | Catechin                                         | Catechin <sup>A,B</sup>                                            | 95               | Sigma (PHL89172)                       |
| 20              | Epicatechin                                      | Epicatechin <sup>A,B</sup>                                         | 98               | Sigma (E4018)                          |
| 21              | Pedunculagin isomer                              | Pedunculagin <sup>A</sup>                                          | 95               | Toronto (P354070)                      |
| 22              | Procyanidin trimer (catechin/epicatechin trimer) | literature data <sup>A</sup>                                       | -                | -                                      |
| 23              | Castalagin                                       | Castalagin <sup>A</sup>                                            | 95               | Sigma (61221)                          |
| 24              | Procyanidin C2                                   | Procyanidin C2 <sup>A</sup>                                        | 95               | TransMIT (C6201-P045)                  |
| 25              | Castalagin isomer                                | Castalagin <sup>A</sup>                                            | 95               | Sigma (61221)                          |
| 26              | Sanguin H2                                       | Sanguin H2 <sup>A</sup>                                            | 92               | Lab collection                         |
| 27              | Cyanidin 3-O-glucoside                           | Cyanidin 3-O-glucoside <sup>A,B</sup>                              | 98               | Sigma (94099)                          |
| 28              | Pelargonidin 3-O-glucoside                       | Pelargonidin 3-O-glucoside <sup>A,B</sup>                          | 98               | ChemFaces (CFN92134)                   |
| 29              | Peonidin 3-O-glucoside                           | Peonidin 3-O-glucoside <sup>A</sup>                                | 95               | Sigma (40796)                          |
| 30              | Cyanidin 3-O-(6''-O-malonyl)-glucoside           | Cyanidin 3-O-(6''-O-malonyl)-glucoside <sup>A</sup>                | 90               | Sigma (PHL85728)                       |
| 31              | Pelargonidin O-malonyl-hexoside                  | literature data <sup>A</sup>                                       | -                | -                                      |
| 32              | Peonidin O-malonyl-hexoside                      | literature data <sup>A</sup>                                       | -                | -                                      |
| 33              | Cyanidin di-O-malonyl-hexoside                   | literature data <sup>A</sup>                                       | -                | -                                      |
| 34              | Pelargonidin di-O-malonyl-hexoside               | literature data <sup>A</sup>                                       | -                | -                                      |
| 35              | Quercetin 3-O-sophoroside                        | Quercetin 3-O-sophoroside <sup>A</sup>                             | 98               | ChemFaces (CFN90630)                   |
| 36              | Quercetin 3-O-glucoside                          | Quercetin 3-O-glucoside <sup>A</sup>                               | 98               | Sigma (16654)                          |
| 37              | Quercetin 3-O-glucuronide                        | Quercetin 3-O-glucuronide <sup>A</sup>                             | 90               | Sigma (90733)                          |
| 38              | Sanguin H6                                       | Sanguin H6 <sup>A</sup>                                            | 92               | Lab collection                         |
| 39              | Sanguin H10                                      | Sanguin H10 <sup>A</sup>                                           | 92               | Lab collection                         |
| 40              | Lambertianin C                                   | Lambertianin C <sup>A</sup><br>Pedunculagin <sup>B</sup>           | 92<br>95         | Lab collection<br>Toronto (P354070)    |
| 41              | Kaempferol 3-O-rutinoside                        | Kaempferol 3-O-rutinoside <sup>A,B</sup>                           | 98               | Sigma (90242)                          |
| 42              | Kaempferol 3-O-glucoside                         | Kaempferol 3-O-glucoside <sup>A,B</sup>                            | 97               | Sigma (79851)                          |
| 43              | Kaempferol 3-O-glucuronide                       | Kaempferol 3-O-glucuronide <sup>A</sup>                            | 98               | ChemFaces (CFN90359)                   |
| 44              | Quercetin 3-O-arabinside                         | Quercetin 3-O-arabinside <sup>A,B</sup>                            | 95               | Sigma (75759)                          |
| 45              | Agrimoniin                                       | Agrimoniin <sup>A,B</sup>                                          | 95               | Lab collection                         |
| 46              | Fragariin A                                      | literature data <sup>A</sup>                                       | -                | -                                      |
| 47              | Kaempferol 3-O-rhamnoside                        | Afzelin <sup>A</sup>                                               | 98               | Sigma (PHL83864)                       |
| 48              | 1-O-Ellagoyl gentiobiose                         | 1-O-Ellagoyl gentiobiose <sup>A</sup><br>Ellagic acid <sup>B</sup> | 92<br>98         | Lab collection<br>ChemFaces (CFN98716) |
| 49              | 1-O-Ellagoyl glucose                             | 1-O-Ellagoyl glucose <sup>A</sup><br>Ellagic acid <sup>B</sup>     | 92<br>98         | Lab collection<br>ChemFaces (CFN98716) |
| 50              | Ellagic acid                                     | Ellagic acid <sup>A,B</sup>                                        | 98               | ChemFaces (CFN98716)                   |
| 51              | Quercetin 3-O-(6''-O-p-coumaroyl)-glucoside      | Helichrysoside <sup>A</sup>                                        | 98               | BioCrick (BCN9477)                     |
| 52              | Quercetin 3-O-(6''-O-acetyl)-glucoside           | Quercetin 3-O-(6''-O-acetyl)-glucoside <sup>A,B</sup>              | 85               | Extrasynthese (1099)                   |

|    |                                                                         |                                                                              |         |                      |
|----|-------------------------------------------------------------------------|------------------------------------------------------------------------------|---------|----------------------|
| 53 | Kaempferol 3- <i>O</i> -(6''- <i>O</i> - <i>p</i> -coumaroyl)-glucoside | Tiliroside <sup>B</sup>                                                      | 98      | Sigma (79257)        |
| 54 | Quercetin 3- <i>O</i> -(2''- <i>O</i> -acetyl)-glucoside                | Quercetin 3- <i>O</i> -(2''- <i>O</i> -acetyl)-glucoside <sup>A</sup>        | 92      | Lab collection       |
| 55 | Kaempferol 3- <i>O</i> -(6''- <i>O</i> -acetyl)-glucoside               | Kaempferol 3- <i>O</i> -(6''- <i>O</i> -acetyl)-glucoside                    | 92      | Lab collection       |
| 56 | Quercetin <i>O</i> -acetyl- <i>O</i> -malonyl- <i>O</i> -hexoside       | Quercetin 3- <i>O</i> -(6''- <i>O</i> -malonyl)-glucoside <sup>B</sup>       | -<br>85 | -<br>Sigma (16733)   |
| 57 | Ellagic acid <i>O</i> -methyl ester- <i>O</i> -desoxyhexoside           | literature data <sup>A</sup>                                                 | -       | -                    |
| 58 | Ellagic acid di- <i>O</i> -methyl ester- <i>O</i> -desoxyhexoside       | literature data <sup>A</sup>                                                 | -       | -                    |
| 59 | Tormentic acid di- <i>O</i> -hexoside                                   | literature data <sup>A</sup>                                                 | -       | -                    |
| 60 | Pomolic acid di- <i>O</i> -hexoside                                     | literature data <sup>A</sup>                                                 | -       | -                    |
| 61 | Tormentic acid <i>O</i> -hexoside                                       | literature data <sup>A</sup>                                                 | -       | -                    |
| 62 | Pomolic acid <i>O</i> -hexoside                                         | literature data <sup>A</sup>                                                 | -       | -                    |
| 63 | Quercetin 3- <i>O</i> -(2'',6''-di- <i>O</i> -acetyl)-glucoside         | Quercetin 3- <i>O</i> -(2'',6''-di- <i>O</i> -acetyl)-glucoside <sup>A</sup> | 90      | Lab collection       |
| 64 | Tormentic acid                                                          | Tormentic acid <sup>A</sup>                                                  | 98      | ChemFaces (CFN99434) |
| 65 | Pomolic acid                                                            | Pomolic acid <sup>A</sup>                                                    | 98      | ChemFaces (CFN99433) |

<sup>a</sup> Standards were used in qualitative (<sup>A</sup>) or/and quantitative analysis (<sup>B</sup>). <sup>b</sup> Manufacturers list: BioCrick—BioCrick (Chengdu, Sichuan, PRC); ChemFaces—ChemFaces (Wuhan, Hubei, PRC); Extrasynthese—Extrasynthese (Lyon, France); Funakoshi—Funakoshi Co. Ltd. (Tokyo, Japan); Sigma—Sigma-Aldrich (St. Louis, MO, USA); Toronto—Toronto Research Chemicals (North York, ON, Canada); TransMIT—TransMIT GmbH (Gießen, Germany).

**Table S3.** Regression equations, correlation coefficients ( $r^2$ ), standard deviation ( $S_{yx}$ ), limits of detection (LOD), limits of quantification (LOQ) and linear ranges for 17 reference standards.

| Compound                                                  | Ionization<br>a | CE <sup>b</sup><br>(eV) | Regression equation <sup>c</sup> |                | $r^2$  | $S_{yx}$              | LOD/<br>LOQ<br>( $\mu\text{g/mL}$ ) | Linear<br>range<br>( $\mu\text{g/mL}$ ) |
|-----------------------------------------------------------|-----------------|-------------------------|----------------------------------|----------------|--------|-----------------------|-------------------------------------|-----------------------------------------|
|                                                           |                 |                         | $a$                              | $b \cdot 10^6$ |        |                       |                                     |                                         |
| Agrimoniin                                                | N               | -35                     | 0.8214                           | -0.2716        | 0.9893 | $5.37 \cdot 10^{-2}$  | 0.22/0.65                           | 0.7–100.0                               |
| Ascorbic acid                                             | N               | -10                     | 0.9214                           | -0.0373        | 0.9997 | $2.10 \cdot 10^{-2}$  | 0.07/0.22                           | 0.3–100.0                               |
| Catechin                                                  | N               | -35                     | 0.9562                           | -0.0521        | 0.9971 | $7.79 \cdot 10^{-2}$  | 0.27/0.82                           | 0.9–100.0                               |
| Cyanidin 3- <i>O</i> -glucoside                           | P               | +10                     | 1.4267                           | -0.5637        | 0.9907 | $12.72 \cdot 10^{-2}$ | 0.29/0.89                           | 0.9–100.0                               |
| Epicatechin                                               | N               | -25                     | 1.4632                           | -0.0524        | 0.9953 | $8.12 \cdot 10^{-2}$  | 0.18/0.56                           | 0.6–100.0                               |
| Ellagic acid                                              | N               | -30                     | 0.9114                           | -0.6312        | 0.9887 | $6.37 \cdot 10^{-2}$  | 0.23/0.70                           | 0.7–100.0                               |
| Gallic acid                                               | N               | -20                     | 2.6538                           | -0.1376        | 0.9990 | $1.17 \cdot 10^{-2}$  | 0.01/0.04                           | 0.1–100.0                               |
| Kaempferol 3- <i>O</i> -glucoside                         | N               | -20                     | 2.0859                           | -0.9171        | 0.9980 | $6.18 \cdot 10^{-2}$  | 0.03/0.09                           | 0.1–100.0                               |
| Kaempferol 3- <i>O</i> -rutinoside                        | N               | -30                     | 1.9634                           | -0.4511        | 0.9952 | $9.18 \cdot 10^{-2}$  | 0.15/0.46                           | 0.5–100.0                               |
| Pedunculagin                                              | N               | -35                     | 0.6370                           | -0.4521        | 0.9872 | $6.11 \cdot 10^{-2}$  | 0.32/0.96                           | 1.0–100.0                               |
| Pelargonidin 3- <i>O</i> -glucoside                       | P               | +10                     | 0.9634                           | -0.8634        | 0.9832 | $10.37 \cdot 10^{-2}$ | 0.36/1.07                           | 1.1–100.0                               |
| Procyanidin B2                                            | N               | -25                     | 1.3620                           | -0.0820        | 0.9961 | $9.91 \cdot 10^{-2}$  | 0.21/0.72                           | 0.8–100.0                               |
| Quercetin 3- <i>O</i> -arabinoside                        | N               | -20                     | 1.4412                           | -0.6211        | 0.9930 | $11.25 \cdot 10^{-2}$ | 0.26/0.78                           | 0.8–100.0                               |
| Quercetin 3- <i>O</i> -(6''- <i>O</i> -acetyl)-glucoside  | N               | -20                     | 1.1103                           | -0.9217        | 0.9901 | $14.33 \cdot 10^{-2}$ | 0.42/1.29                           | 1.5–100.0                               |
| Quercetin 3- <i>O</i> -(6''- <i>O</i> -malonyl)-glucoside | N               | -20                     | 1.2703                           | -0.7911        | 0.9814 | $15.26 \cdot 10^{-2}$ | 0.40/1.20                           | 1.5–100.0                               |
| Strictinin                                                | N               | -35                     | 0.9634                           | -0.3518        | 0.9804 | $7.34 \cdot 10^{-2}$  | 0.25/0.76                           | 0.8–100.0                               |
| Tiliroside                                                | N               | -30                     | 2.3312                           | -0.4563        | 0.9803 | $14.92 \cdot 10^{-2}$ | 0.21/0.64                           | 0.7–100.0                               |

<sup>a</sup> Ionization mode : N—negative, P—positive. <sup>b</sup> CE—collision energy. <sup>c</sup> Regression equation:  $y = a \cdot x + b$ .

**Table S4.** Nutritional and chemical composition of wild and cultivated samples of *F. orientalis* fruits.

| Parameter                         | YW-01 | YW-02 | YW-03  | YW-04  | YW-05  | YW-06  | YW-07 | YW-08 | YW-09  | YW-10  |
|-----------------------------------|-------|-------|--------|--------|--------|--------|-------|-------|--------|--------|
| Dry matter, g/100 g               | 17.2  | 17.6  | 17.0   | 16.3   | 18.1   | 17.0   | 16.7  | 16.0  | 18.3   | 17.5   |
| Ash, g/100 g                      | 0.9   | 0.9   | 0.8    | 0.9    | 0.7    | 0.9    | 0.6   | 0.7   | 0.8    | 0.8    |
| Protein, g/100 g                  | 0.4   | 0.4   | 0.4    | 0.5    | 0.4    | 0.4    | 0.5   | 0.5   | 0.5    | 0.4    |
| Lipids, g/100 g                   | 1.0   | 1.1   | 1.0    | 0.9    | 1.0    | 1.1    | 0.8   | 0.9   | 1.1    | 1.0    |
| Carbohydrates, g/100 g            | 10.3  | 10.0  | 9.7    | 10.4   | 9.5    | 9.7    | 9.0   | 10.4  | 9.2    | 9.1    |
| Fructose, g/100 g                 | 1.8   | 1.5   | 2.2    | 1.6    | 1.7    | 1.9    | 2.0   | 2.1   | 2.1    | 1.5    |
| Glucose, g/100 g                  | 1.6   | 1.5   | 2.0    | 1.5    | 1.6    | 1.8    | 2.0   | 2.0   | 1.9    | 1.4    |
| Sucrose, g/100 g                  | 1.5   | 2.0   | 1.6    | 1.8    | 2.0    | 1.4    | 1.5   | 1.9   | 1.8    | 2.0    |
| Total dietary fibers, g/100 g     | 5.1   | 5.2   | 5.0    | 4.8    | 5.2    | 5.3    | 5.0   | 4.6   | 5.1    | 5.0    |
| Soluble dietary fibers, g/100 g   | 4.4   | 4.4   | 4.2    | 4.1    | 4.5    | 4.5    | 4.3   | 4.1   | 4.4    | 4.2    |
| Insoluble dietary fibers, g/100 g | 0.7   | 0.8   | 0.8    | 0.7    | 0.7    | 0.8    | 0.7   | 0.5   | 0.7    | 0.8    |
| Titrateable acids, g/100 g        | 1.1   | 1.0   | 0.8    | 1.2    | 1.4    | 1.0    | 0.9   | 0.9   | 1.0    | 0.9    |
| Ascorbic acid, mg/100 g           | 124.0 | 141.4 | 129.1  | 89.8   | 92.1   | 108.4  | 149.6 | 120.1 | 155.0  | 96.4   |
| Anthocyanins, mg/100 g            | 8.5   | 12.4  | 15.0   | 9.1    | 7.3    | 10.2   | 10.7  | 11.4  | 9.2    | 11.0   |
| Ellagic acid free, mg/100 g       | 15.3  | 14.1  | 10.7   | 10.5   | 12.3   | 11.3   | 8.6   | 10.3  | 12.8   | 10.3   |
| Ellagic acid total, mg/100 g      | 281.3 | 252.0 | 231.6  | 220.6  | 269.2  | 240.4  | 209.9 | 197.2 | 233.3  | 214.3  |
| Catechins, mg/100 g               | 3.4   | 4.3   | 4.4    | 3.5    | 5.0    | 2.6    | 3.4   | 3.9   | 4.4    | 4.2    |
| Procyanidins, mg/100 g            | 6.0   | 7.6   | 7.8    | 6.2    | 7.3    | 5.9    | 6.0   | 5.3   | 5.2    | 6.0    |
| Flavonoids, mg/100 g              | 5.1   | 4.2   | 2.2    | 4.3    | 4.2    | 5.1    | 6.1   | 4.3   | 4.1    | 5.4    |
| Total phenolics, mg/100 g         | 855.5 | 929.1 | 1053.0 | 714.0  | 972.9  | 856.6  | 760.1 | 853.1 | 1125.8 | 1063.2 |
| Parameter                         | BW-01 | BW-02 | BW-03  | BW-04  | BW-05  | BW-06  | BW-07 | BW-08 | BW-09  | BW-10  |
| Dry matter, g/100 g               | 19.7  | 19.3  | 22.1   | 20.6   | 18.6   | 19.1   | 23.1  | 22.0  | 20.6   | 19.9   |
| Ash, g/100 g                      | 0.9   | 1.0   | 1.2    | 1.4    | 0.9    | 1.0    | 1.1   | 1.0   | 1.0    | 0.9    |
| Protein, g/100 g                  | 0.5   | 0.5   | 0.4    | 0.6    | 0.6    | 0.5    | 0.6   | 0.6   | 0.5    | 0.5    |
| Lipids, g/100 g                   | 1.2   | 1.4   | 1.2    | 1.0    | 1.4    | 1.4    | 1.1   | 1.0   | 1.0    | 1.2    |
| Carbohydrates, g/100 g            | 12.5  | 12.0  | 11.6   | 14.0   | 12.9   | 12.0   | 11.0  | 11.5  | 14.0   | 12.8   |
| Fructose, g/100 g                 | 2.1   | 2.2   | 2.0    | 2.3    | 1.9    | 1.8    | 2.0   | 2.1   | 2.0    | 2.0    |
| Glucose, g/100 g                  | 1.8   | 1.9   | 1.8    | 2.0    | 1.9    | 1.7    | 1.9   | 2.0   | 1.8    | 1.9    |
| Sucrose, g/100 g                  | 1.9   | 1.8   | 2.0    | 1.8    | 1.8    | 2.0    | 1.9   | 2.1   | 2.1    | 2.0    |
| Total dietary fibers, g/100 g     | 5.6   | 5.3   | 6.0    | 6.1    | 6.0    | 5.8    | 5.8   | 5.7   | 5.6    | 6.0    |
| Soluble dietary fibers, g/100 g   | 4.6   | 4.4   | 5.0    | 5.0    | 5.2    | 5.0    | 4.9   | 5.1   | 4.8    | 5.1    |
| Insoluble dietary fibers, g/100 g | 1.0   | 0.9   | 1.0    | 1.1    | 0.8    | 0.8    | 0.9   | 0.6   | 0.8    | 0.9    |
| Titrateable acids, g/100 g        | 1.0   | 1.0   | 0.9    | 1.0    | 1.1    | 0.8    | 0.9   | 0.8   | 1.0    | 1.0    |
| Ascorbic acid, mg/100 g           | 146.0 | 159.2 | 150.1  | 140.8  | 128.6  | 120.3  | 167.1 | 143.0 | 128.9  | 150.2  |
| Anthocyanins, mg/100 g            | 9.3   | 9.5   | 10.8   | 11.3   | 14.2   | 11.2   | 9.8   | 8.2   | 10.7   | 11.5   |
| Ellagic acid free, mg/100 g       | 17.5  | 22.3  | 25.9   | 14.6   | 12.9   | 25.6   | 28.7  | 20.6  | 16.3   | 20.5   |
| Ellagic acid total, mg/100 g      | 360.4 | 322.8 | 394.3  | 352.6  | 389.2  | 364.0  | 406.6 | 346.1 | 327.8  | 359.0  |
| Catechins, mg/100 g               | 4.0   | 4.2   | 3.8    | 3.8    | 4.0    | 4.1    | 4.3   | 4.0   | 4.0    | 3.2    |
| Procyanidins, mg/100 g            | 5.3   | 5.0   | 6.1    | 5.2    | 5.0    | 6.7    | 4.8   | 4.7   | 4.5    | 5.6    |
| Flavonoids, mg/100 g              | 3.1   | 3.3   | 3.6    | 4.2    | 3.2    | 3.8    | 3.5   | 3.0   | 4.0    | 4.0    |
| Total phenolics, mg/100 g         | 926.1 | 853.9 | 1001.4 | 1242.2 | 1463.1 | 1269.0 | 967.7 | 866.3 | 973.2  | 980.4  |
| Parameter                         | BC-01 | BC-02 | BC-03  | BC-04  | BC-05  | BC-06  | BC-07 | BC-08 | BC-09  | BC-10  |
| Dry matter, g/100 g               | 17.8  | 19.3  | 20.2   | 20.0   | 19.3   | 18.9   | 20.7  | 20.3  | 20.5   | 20.0   |
| Ash, g/100 g                      | 0.8   | 0.7   | 0.8    | 0.9    | 0.8    | 0.8    | 0.8   | 0.7   | 0.7    | 0.8    |
| Protein, g/100 g                  | 0.5   | 0.4   | 0.4    | 0.5    | 0.5    | 0.4    | 0.5   | 0.5   | 0.6    | 0.5    |
| Lipids, g/100 g                   | 0.9   | 1.0   | 0.9    | 1.1    | 1.0    | 1.0    | 0.9   | 0.8   | 0.9    | 0.8    |
| Carbohydrates, g/100 g            | 10.3  | 11.2  | 11.0   | 10.8   | 10.5   | 10.3   | 11.8  | 10.6  | 10.5   | 10.0   |
| Fructose, g/100 g                 | 2.0   | 1.9   | 1.8    | 2.0    | 1.9    | 1.9    | 2.0   | 1.9   | 2.0    | 2.0    |
| Glucose, g/100 g                  | 1.8   | 1.8   | 1.7    | 1.8    | 1.7    | 1.7    | 1.8   | 1.6   | 1.8    | 1.8    |
| Sucrose, g/100 g                  | 1.9   | 1.7   | 1.6    | 1.7    | 1.9    | 1.9    | 2.0   | 1.6   | 1.7    | 1.7    |
| Total dietary fibers, g/100 g     | 5.6   | 5.8   | 5.7    | 5.6    | 5.5    | 5.5    | 5.4   | 5.6   | 5.8    | 5.9    |
| Soluble dietary fibers, g/100 g   | 5.0   | 5.2   | 5.0    | 5.0    | 4.9    | 4.8    | 4.7   | 5.0   | 5.0    | 5.1    |

|                                   |       |       |       |       |       |       |       |       |       |       |
|-----------------------------------|-------|-------|-------|-------|-------|-------|-------|-------|-------|-------|
| Insoluble dietary fibers, g/100 g | 0.6   | 0.6   | 0.7   | 0.6   | 0.6   | 0.7   | 0.7   | 0.6   | 0.8   | 0.8   |
| Titrateable acids, g/100 g        | 0.9   | 0.8   | 0.8   | 0.8   | 0.9   | 0.9   | 0.8   | 0.8   | 0.8   | 0.8   |
| Ascorbic acid, mg/100 g           | 126.4 | 125.0 | 125.9 | 118.6 | 134.2 | 120.7 | 109.6 | 112.7 | 120.8 | 127.3 |
| Anthocyanins, mg/100 g            | 12.7  | 14.9  | 15.2  | 14.7  | 15.9  | 17.2  | 16.3  | 10.8  | 14.6  | 14.0  |
| Ellagic acid free, mg/100 g       | 10.3  | 10.9  | 11.2  | 10.5  | 10.6  | 11.8  | 10.8  | 10.8  | 14.2  | 12.7  |
| Ellagic acid total, mg/100 g      | 320.6 | 315.7 | 306.8 | 326.3 | 318.9 | 329.4 | 340.8 | 330.9 | 314.7 | 308.2 |
| Catechins, mg/100 g               | 4.2   | 4.0   | 4.6   | 4.2   | 4.0   | 3.8   | 4.0   | 3.9   | 4.3   | 4.2   |
| Procyanidins, mg/100 g            | 6.2   | 6.1   | 6.0   | 5.2   | 5.8   | 6.3   | 6.2   | 6.0   | 6.1   | 6.1   |
| Flavonoids, mg/100 g              | 4.1   | 4.0   | 4.3   | 4.0   | 3.8   | 3.6   | 3.8   | 4.0   | 4.1   | 4.1   |
| Total phenolics, mg/100 g         | 823.6 | 879.2 | 714.6 | 782.6 | 825.1 | 817.3 | 893.2 | 852.4 | 822.0 | 814.3 |



**Table S5.** Demographic information of participants of *Fragaria* fruits sensory evaluation.

| Index  | Percentage (n) |
|--------|----------------|
| Gender |                |
| male   | 50 (30)        |
| female | 50 (30)        |
| Age    |                |
| 18–30  | 32 (53)        |
| 30–40  | 20 (33)        |
| > 40   | 8 (14)         |

**Table S6.** Sensory evaluation data of *Fragaria* fruits.

| Index                | <i>F. orientalis</i><br>wild Yakutia | <i>F. orientalis</i><br>wild Buryatia | <i>F. orientalis</i> culti-<br>vated Buryatia | <i>F. ananassa</i> culti-<br>vated Buryatia |
|----------------------|--------------------------------------|---------------------------------------|-----------------------------------------------|---------------------------------------------|
| Color acceptability  | 9.0 ± 0.7                            | 9.1 ± 0.7                             | 9.4 ± 0.2                                     | 9.5 ± 0.4                                   |
| Flavor acceptability | 8.6 ± 0.6                            | 8.8 ± 0.6                             | 9.2 ± 0.4                                     | 9.7 ± 0.2                                   |
| Saltiness            | 9.2 ± 0.7                            | 9.1 ± 0.7                             | 9.2 ± 0.6                                     | 9.5 ± 0.4                                   |
| Bitterness           | 9.5 ± 0.4                            | 9.5 ± 0.6                             | 9.6 ± 0.4                                     | 9.6 ± 0.2                                   |
| Sourness             | 9.0 ± 0.9                            | 9.1 ± 0.9                             | 9.3 ± 0.4                                     | 9.6 ± 0.3                                   |
| Astringency          | 8.8 ± 1.0                            | 8.9 ± 1.0                             | 9.2 ± 0.6                                     | 9.7 ± 0.2                                   |
| Sweetness            | 9.0 ± 0.6                            | 9.2 ± 0.6                             | 9.0 ± 0.8                                     | 9.8 ± 0.1                                   |
| Juiciness            | 9.4 ± 0.3                            | 9.4 ± 0.4                             | 9.5 ± 0.3                                     | 9.8 ± 0.1                                   |
| Overall preferences  | 9.4 ± 0.5                            | 9.5 ± 0.3                             | 9.5 ± 0.3                                     | 10                                          |

Preference scale ranged from 0 (greatest imaginary dislike) to 10 (greatest imaginary like).

**Table S7.** Chromatographic (*t*), ultraviolet (UV) and mass-spectrometric data of compounds **1–65** found in *F. orientalis* fruits.

| No.                         | <i>t</i> ,<br>min | UV<br>spectrum,<br>$\lambda_{max}$ , nm | Deprotonated<br>ion, <i>m/z</i> <sup>a</sup> | MS <sup>2</sup> , <i>m/z</i>                                                                    | Compound [ref.]                                                              | IL<br><sub>b</sub> |
|-----------------------------|-------------------|-----------------------------------------|----------------------------------------------|-------------------------------------------------------------------------------------------------|------------------------------------------------------------------------------|--------------------|
| Carbohydrates               |                   |                                         |                                              |                                                                                                 |                                                                              |                    |
| 1                           | 1.48              |                                         | 341 <sup>I</sup>                             |                                                                                                 | Hexosyl-hexose [41]                                                          | 2                  |
| 2                           | 1.55              |                                         | 179 <sup>I</sup>                             |                                                                                                 | Hexose [41]                                                                  | 2                  |
| Organic acids               |                   |                                         |                                              |                                                                                                 |                                                                              |                    |
| 3                           | 1.89              |                                         | 191 <sup>I</sup>                             |                                                                                                 | Citric acid                                                                  | 1                  |
| 4                           | 2.18              |                                         | 133 <sup>I</sup>                             |                                                                                                 | Malic acid                                                                   | 1                  |
| 5                           | 2.52              |                                         | 149 <sup>I</sup>                             |                                                                                                 | Tartaric acid                                                                | 1                  |
| 6                           | 2.94              |                                         | 115 <sup>I</sup>                             |                                                                                                 | Fumaric acid                                                                 | 1                  |
| 7                           | 5.01              | 265                                     | 175 <sup>I</sup>                             |                                                                                                 | Ascorbic acid                                                                | 1                  |
| Gallic acid and derivatives |                   |                                         |                                              |                                                                                                 |                                                                              |                    |
| 8                           | 5.38              | 272                                     | 331 <sup>I</sup>                             | 169 (100), 125 (51)                                                                             | 1- <i>O</i> -Galloyl glucose [42]                                            | 1                  |
| 9                           | 5.61              | 272                                     | 331 <sup>I</sup>                             | 169 (100), 125 (42)                                                                             | Galloyl hexose [42]                                                          | 2                  |
| 10                          | 5.94              | 270                                     | 169 <sup>I</sup>                             |                                                                                                 | Gallic acid [42]                                                             | 1                  |
| Ellagitannins               |                   |                                         |                                              |                                                                                                 |                                                                              |                    |
| 11                          | 6.05              | 220, 250                                | 783 <sup>I</sup> ; 391 <sup>III</sup>        | 633 (21), 481 (82), 301 (100)                                                                   | Pedunculagin [43]                                                            | 1                  |
| 13                          | 8.08              | 260                                     | 633 <sup>I</sup>                             | 481 (18), 331 (54), 301 (100)                                                                   | Strictinin [43]                                                              | 1                  |
| 15                          | 9.28              | 220, 250                                | 783 <sup>I</sup> ; 391 <sup>III</sup>        | 633 (18), 481 (78), 301 (100)                                                                   | Pedunculagin isomer [43]                                                     | 2                  |
| 18                          | 10.26             | 260                                     | 633 <sup>I</sup>                             | 481 (14), 331 (57), 301 (100)                                                                   | Strictinin isomer [43]                                                       | 2                  |
| 21                          | 11.62             | 220, 250                                | 783 <sup>I</sup> ; 391 <sup>III</sup>        | 633, 481, 301                                                                                   | Pedunculagin isomer [43]                                                     | 2                  |
| 23                          | 12.41             | 220                                     | 933 <sup>I</sup> ; 466 <sup>III</sup>        | 301                                                                                             | Castalagin [43]                                                              | 1                  |
| 25                          | 13.09             | 220                                     | 933 <sup>I</sup> ; 466 <sup>III</sup>        | 301                                                                                             | Castalagin isomer [43]                                                       | 2                  |
| 26                          | 13.40             | 236                                     | 1103 <sup>I</sup> ; 551 <sup>III</sup>       | 951 (5), 933 (9), 783 (11), 633 (53),<br>481 (27), 301 (100)                                    | Sanguiin H2 [43]                                                             | 1                  |
| 38                          | 20.43             | 235                                     | 1869 <sup>I</sup> ; 934 <sup>III</sup>       | 1701 (2), 1567 (5), 1265 (3), 1085<br>(8), 935 (12), 783 (50), 633 (83), 481<br>(12), 301 (100) | Sanguiin H6 [43]                                                             | 1                  |
| 39                          | 20.62             | 230, 310                                | 1567 <sup>I</sup> ; 783 <sup>III</sup>       | 933 (11), 633 (23), 301 (100)                                                                   | Sanguiin H10 [43]                                                            | 1                  |
| 40                          | 21.02             | 312                                     | 1401 <sup>III</sup>                          | 1235 (4), 933 (5), 783 (14), 633 (37),<br>301 (100)                                             | Lambertianin C [43]                                                          | 1                  |
| 45                          | 23.11             | 235, 354                                | 1869 <sup>I</sup> ; 934 <sup>III</sup>       | 1567 (2), 1265 (4), 1085 (9), 935<br>(17), 783 (34), 633 (21), 481 (11),<br>301 (100)           | Agrimoniin [43]                                                              | 1                  |
| 46                          | 23.51             | 220, 270                                | 1018 <sup>III</sup>                          | 1691 (2), 1567 (3), 1265 (3), 1209<br>(5), 935 (11), 783 (27), 633 (14), 481<br>(62), 301 (100) | Fragariin A [45]                                                             | 2                  |
| 48                          | 24.60             | 252, 350                                | 625 <sup>I</sup>                             | 463 (50), 301 (100), 229 (31)                                                                   | 1- <i>O</i> -Ellagoyl gentiobiose [46]                                       | 1                  |
| 49                          | 25.09             | 250, 353                                | 463 <sup>I</sup>                             | 301 (100), 229 (31)                                                                             | 1- <i>O</i> -Ellagoyl glucose [46]                                           | 1                  |
| 50                          | 25.53             | 250, 353                                | 301 <sup>I</sup>                             | 229                                                                                             | Ellagic acid [46]                                                            | 1                  |
| 57                          | 30.83             | 250, 353                                | 461 <sup>I</sup>                             | 315 (53), 301 (100)                                                                             | Ellagic acid <i>O</i> -methyl ester- <i>O</i> -desoxyhexo-<br>side [10,46]   | 2                  |
| 58                          | 31.02             | 250, 353                                | 475 <sup>I</sup>                             | 329 (42), 301 (100)                                                                             | Ellagic acid di- <i>O</i> -methyl ester-<br><i>O</i> -desoxyhexoside [10,46] | 2                  |
| Hydroxycinnamates           |                   |                                         |                                              |                                                                                                 |                                                                              |                    |
| 12                          | 6.33              | 328                                     | 353 <sup>I</sup>                             | 191 (28), 179 (100), 173 (94), 135<br>(21)                                                      | 4- <i>O</i> -Caffeoylquinic acid [21]                                        | 1                  |
| 16                          | 9.51              | 328                                     | 353 <sup>I</sup>                             | 191 (100), 165 (18)                                                                             | 5- <i>O</i> -Caffeoylquinic acid [21]                                        | 1                  |
| Procyanidins and catechins  |                   |                                         |                                              |                                                                                                 |                                                                              |                    |
| 14                          | 8.93              | 280                                     | 577 <sup>I</sup>                             | 289                                                                                             | Procyanidin B2 [42]                                                          | 1                  |
| 17                          | 10.02             | 280                                     | 577 <sup>I</sup>                             | 289                                                                                             | Procyanidin B4 [42]                                                          | 1                  |
| 19                          | 10.56             | 280                                     | 289 <sup>I</sup>                             |                                                                                                 | Catechin [42]                                                                | 1                  |
| 20                          | 11.41             | 280                                     | 289 <sup>I</sup>                             |                                                                                                 | Epicatechin [42]                                                             | 1                  |

|                     |       |               |                   |                                         |                                                                              |   |
|---------------------|-------|---------------|-------------------|-----------------------------------------|------------------------------------------------------------------------------|---|
| 22                  | 11.99 | 280           | 865 <sup>I</sup>  | 577, 289                                | Procyanidin trimer (catechin/epicatechin trimer) [42]                        | 2 |
| 24                  | 12.76 | 280           | 865 <sup>I</sup>  | 577, 289                                | Procyanidin C2 [42]                                                          | 1 |
| Anthocyanins        |       |               |                   |                                         |                                                                              |   |
| 27                  | 13.62 | 515           | 447 <sup>II</sup> | 285                                     | Cyanidin 3- <i>O</i> -glucoside [44]                                         | 1 |
| 28                  | 13.82 | 503           | 431 <sup>II</sup> | 269                                     | Pelargonidin 3- <i>O</i> -glucoside [44]                                     | 1 |
| 29                  | 14.05 | 520           | 461 <sup>II</sup> | 299                                     | Peonidin 3- <i>O</i> -glucoside [44]                                         | 1 |
| 30                  | 14.48 | 515           | 533 <sup>II</sup> | 447 (31), 285 (100)                     | Cyanidin 3- <i>O</i> -(6''- <i>O</i> -malonyl)-glucoside [44]                | 1 |
| 31                  | 14.98 | 502           | 517 <sup>II</sup> | 431 (22), 285 (100)                     | Pelargonidin <i>O</i> -malonyl-hexoside [44]                                 | 2 |
| 32                  | 15.14 | 520           | 547 <sup>II</sup> | 461 (35), 299 (100)                     | Peonidin <i>O</i> -malonyl-hexoside [44]                                     | 2 |
| 33                  | 15.54 | 515           | 619 <sup>II</sup> | 533 (5), 447 (31), 285 (100)            | Cyanidin di- <i>O</i> -malonyl-hexoside [44]                                 | 2 |
| 34                  | 16.10 | 502           | 603 <sup>II</sup> | 517 (3), 431 (22), 285 (100)            | Pelargonidin di- <i>O</i> -malonyl-hexoside [44]                             | 2 |
| Flavonol glycosides |       |               |                   |                                         |                                                                              |   |
| 35                  | 17.58 | 256, 264, 355 | 625 <sup>I</sup>  | 463 (52), 301 (100)                     | Quercetin 3- <i>O</i> -sophoroside [40,41]                                   | 1 |
| 36                  | 19.53 | 256, 266, 355 | 463 <sup>I</sup>  | 301                                     | Quercetin 3- <i>O</i> -glucoside [40,41]                                     | 1 |
| 37                  | 19.97 | 256, 266, 355 | 477 <sup>I</sup>  | 301                                     | Quercetin 3- <i>O</i> -glucuronide [40,41]                                   | 1 |
| 41                  | 21.43 | 265, 350      | 593 <sup>I</sup>  | 447 (14), 285 (100)                     | Kaempferol 3- <i>O</i> -rutinoside [40,41]                                   | 1 |
| 42                  | 21.71 | 265, 350      | 447 <sup>I</sup>  | 285                                     | Kaempferol 3- <i>O</i> -glucoside [40,41]                                    | 1 |
| 43                  | 21.97 | 265, 350      | 461 <sup>I</sup>  | 285                                     | Kaempferol 3- <i>O</i> -glucuronide [40,41]                                  | 1 |
| 44                  | 22.88 | 255, 264, 354 | 433 <sup>I</sup>  | 301                                     | Quercetin 3- <i>O</i> -arabinoside [40,41]                                   | 1 |
| 47                  | 23.98 | 265, 350      | 431 <sup>I</sup>  | 285                                     | Kaempferol 3- <i>O</i> -rhamnoside [40,41]                                   | 1 |
| 51                  | 26.42 | 255, 264, 354 | 609 <sup>I</sup>  | 463 (22), 301 (100)                     | Quercetin 3- <i>O</i> -(6''- <i>O</i> - <i>p</i> -coumaroyl)-glucoside [47]  | 1 |
| 52                  | 26.83 | 255, 264, 354 | 505 <sup>I</sup>  | 463 (20), 301 (100)                     | Quercetin 3- <i>O</i> -(6''- <i>O</i> -acetyl)-glucoside [48]                | 1 |
| 53                  | 27.43 | 265, 350      | 593 <sup>I</sup>  | 447 (29), 285 (100)                     | Kaempferol 3- <i>O</i> -(6''- <i>O</i> - <i>p</i> -coumaroyl)-glucoside [47] | 1 |
| 54                  | 27.91 | 255, 264, 354 | 505 <sup>I</sup>  | 463 (8), 301 (100)                      | Quercetin 3- <i>O</i> -(2''- <i>O</i> -acetyl)-glucoside [48]                | 1 |
| 55                  | 28.40 | 255, 264, 354 | 505 <sup>I</sup>  | 463 (11), 301 (100)                     | Quercetin 3- <i>O</i> -(6''- <i>O</i> -acetyl)-glucoside [48]                | 1 |
| 56                  | 30.26 | 255, 264, 354 | 591 <sup>I</sup>  | 549 (24), 505 (73), 463 (21), 301 (100) | Quercetin <i>O</i> -acetyl- <i>O</i> -malonyl- <i>O</i> -hexoside [10]       | 2 |
| 63                  | 34.02 | 255, 264, 354 | 547 <sup>I</sup>  | 505 (64), 463 (22), 301 (100)           | Quercetin 3- <i>O</i> -(2'',6''-di- <i>O</i> -acetyl)-glucoside [48]         | 1 |
| Triterpenes         |       |               |                   |                                         |                                                                              |   |
| 59                  | 31.63 |               | 811 <sup>I</sup>  | 649 (5), 487 (100)                      | Tormentic acid di- <i>O</i> -hexoside [10]                                   | 2 |
| 60                  | 31.93 |               | 795 <sup>I</sup>  | 633 (11), 471 (100)                     | Pomolic acid di- <i>O</i> -hexoside [10]                                     | 2 |
| 61                  | 32.44 |               | 649 <sup>I</sup>  | 487                                     | Tormentic acid <i>O</i> -hexoside [10]                                       | 2 |
| 62                  | 32.68 |               | 633 <sup>I</sup>  | 471                                     | Pomolic acid <i>O</i> -hexoside [10]                                         | 2 |
| 64                  | 34.38 |               | 487 <sup>I</sup>  |                                         | Tormentic acid [10]                                                          | 1 |
| 65                  | 34.52 |               | 471 <sup>I</sup>  |                                         | Pomolic acid [10]                                                            | 1 |

<sup>a</sup> Deprotonated ions: <sup>I</sup> [M-H]<sup>−</sup>, <sup>II</sup> [M-2H]<sup>−</sup>, <sup>III</sup> [M-2H]<sup>2−</sup>. <sup>b</sup> Identification levels: (1) identified compounds after comparison of UV, mass-spectral data, and retention time with reference standards; (2) putatively annotated compounds after comparison of UV and mass-spectral data with literature data.

**Table S8.** Quantitative content of 21 compounds in *Fragaria* fruits, mg/100 g fresh weight.

| Plant No | Compound No |    |     |    |    |    |    |    |    |    |     |    |    |    |     |    |    |    |    |    |    |
|----------|-------------|----|-----|----|----|----|----|----|----|----|-----|----|----|----|-----|----|----|----|----|----|----|
|          | 7           | 10 | 13  | 14 | 19 | 20 | 27 | 28 | 31 | 34 | 40  | 41 | 42 | 44 | 45  | 48 | 49 | 50 | 52 | 53 | 56 |
| YW-01    | 124         | 53 | 109 | 5  | 2  | 2  | 1  | 8  | 3  | 4  | 15  | 1  | 1  | 2  | 152 | 3  | 3  | 15 | 3  | 4  | 2  |
| YW-02    | 108         | 50 | 114 | 3  | 2  | 1  | 1  | 9  | 4  | 3  | 10  | 2  | 2  | 1  | 170 | 3  | 2  | 18 | 3  | 5  | 1  |
| YW-03    | 139         | 61 | 127 | 4  | 1  | 3  | 2  | 7  | 4  | 5  | 8   | 2  | 1  | 2  | 141 | 4  | 2  | 11 | 2  | 5  | 1  |
| YW-04    | 101         | 54 | 134 | 7  | 1  | 2  | 1  | 11 | 5  | 5  | 9   | 2  | 2  | 2  | 175 | 3  | 2  | 19 | 3  | 4  | 2  |
| YW-05    | 108         | 42 | 108 | 2  | 2  | 1  | 2  | 10 | 4  | 6  | 12  | 3  | 2  | 4  | 193 | 1  | 1  | 22 | 1  | 3  | 2  |
| YW-06    | 153         | 73 | 111 | 3  | 2  | 1  | 2  | 7  | 1  | 7  | 11  | 1  | 1  | 1  | 154 | 5  | 2  | 25 | 1  | 2  | 1  |
| YW-07    | 111         | 89 | 114 | 4  | 1  | 1  | 1  | 9  | 2  | 10 | 8   | 1  | 1  | 1  | 170 | 3  | 2  | 14 | 3  | 3  | 1  |
| YW-08    | 132         | 56 | 123 | 4  | 1  | 1  | 1  | 9  | 2  | 11 | 11  | 1  | 2  | 1  | 160 | 2  | 1  | 18 | 2  | 3  | 1  |
| YW-09    | 109         | 50 | 139 | 5  | 2  | 3  | 1  | 7  | 4  | 8  | 10  | 2  | 1  | 1  | 141 | 7  | 3  | 17 | 2  | 3  | 1  |
| YW-10    | 108         | 53 | 120 | 3  | 3  | 2  | 1  | 8  | 1  | 2  | 7   | 2  | 1  | 2  | 140 | 2  | 1  | 15 | 2  | 2  | 1  |
| BW-01    | 152         | 64 | 115 | 3  | 1  | 2  | 1  | 10 | 3  | 2  | 18  | 1  | 2  | 2  | 193 | 4  | 2  | 17 | 2  | 1  | 2  |
| BW-02    | 161         | 75 | 125 | 4  | 2  | 2  | 2  | 11 | 2  | 3  | 21  | 2  | 2  | 3  | 146 | 5  | 4  | 18 | 1  | 2  | 3  |
| BW-03    | 160         | 89 | 133 | 8  | 2  | 3  | 2  | 8  | 2  | 4  | 20  | 1  | 1  | 3  | 134 | 3  | 2  | 17 | 1  | 2  | 2  |
| BW-04    | 144         | 63 | 164 | 6  | 4  | 3  | 3  | 8  | 2  | 4  | 17  | 2  | 2  | 2  | 152 | 3  | 2  | 29 | 2  | 1  | 2  |
| BW-05    | 109         | 91 | 167 | 4  | 2  | 2  | 1  | 5  | 3  | 3  | 14  | 3  | 3  | 1  | 181 | 7  | 3  | 31 | 1  | 1  | 1  |
| BW-06    | 135         | 52 | 160 | 7  | 1  | 2  | 2  | 4  | 4  | 2  | 10  | 2  | 1  | 2  | 180 | 10 | 5  | 15 | 1  | 1  | 2  |
| BW-07    | 139         | 57 | 168 | 7  | 2  | 1  | 2  | 5  | 7  | 2  | 18  | 1  | 2  | 2  | 192 | 6  | 2  | 16 | 1  | 2  | 2  |
| BW-08    | 172         | 42 | 130 | 6  | 2  | 1  | 2  | 12 | 2  | 4  | 14  | 2  | 2  | 2  | 142 | 2  | 1  | 22 | 2  | 3  | 3  |
| BW-09    | 140         | 81 | 140 | 9  | 2  | 1  | 1  | 14 | 2  | 5  | 15  | 2  | 2  | 3  | 145 | 4  | 1  | 25 | 2  | 1  | 2  |
| BW-10    | 132         | 80 | 117 | 4  | 1  | 1  | 1  | 10 | 5  | 4  | 14  | 2  | 2  | 3  | 149 | 4  | 1  | 14 | 2  | 1  | 2  |
| BC-01    | 108         | 42 | 63  | 5  | 1  | 1  | 2  | 10 | 2  | 7  | 10  | 1  | 0  | 3  | 120 | 1  | 0  | 14 | 1  | 4  | 1  |
| BC-02    | 133         | 39 | 75  | 4  | 1  | 1  | 3  | 11 | 4  | 6  | 8   | 1  | 0  | 2  | 106 | 2  | 1  | 11 | 0  | 4  | 1  |
| BC-03    | 127         | 51 | 84  | 4  | 1  | 1  | 3  | 12 | 3  | 3  | 9   | 2  | 1  | 1  | 111 | 1  | 0  | 9  | 1  | 3  | 0  |
| BC-04    | 125         | 57 | 82  | 5  | 1  | 2  | 2  | 14 | 5  | 2  | 10  | 2  | 1  | 1  | 105 | 1  | 0  | 20 | 1  | 3  | 1  |
| BC-05    | 120         | 29 | 80  | 5  | 1  | 1  | 2  | 12 | 6  | 3  | 11  | 2  | 1  | 1  | 98  | 3  | 1  | 15 | 1  | 4  | 1  |
| BC-06    | 135         | 39 | 72  | 3  | 1  | 1  | 2  | 10 | 1  | 3  | 10  | 2  | 1  | 1  | 114 | 2  | 1  | 17 | 0  | 5  | 2  |
| BC-07    | 111         | 45 | 64  | 1  | 2  | 1  | 2  | 10 | 7  | 2  | 8   | 1  | 1  | 2  | 92  | 1  | 0  | 11 | 1  | 4  | 2  |
| BC-08    | 105         | 30 | 60  | 2  | 1  | 1  | 3  | 11 | 2  | 2  | 12  | 1  | 0  | 1  | 97  | 1  | 0  | 10 | 1  | 4  | 1  |
| IV-01    | 84          | 1  | 10  | 2  | 3  | 0  | 3  | 2  | 0  | 0  | 86  | 7  | 5  | 1  | 135 | 0  | 0  | 12 | 2  | 1  | 0  |
| IV-02    | 89          | 2  | 12  | 2  | 4  | 1  | 1  | 2  | 0  | 0  | 93  | 5  | 7  | 1  | 140 | 0  | 0  | 10 | 3  | 2  | 0  |
| IV-03    | 106         | 1  | 14  | 1  | 5  | 0  | 1  | 2  | 0  | 0  | 108 | 8  | 3  | 1  | 147 | 0  | 0  | 9  | 3  | 2  | 1  |
| IV-04    | 110         | 5  | 10  | 2  | 2  | 0  | 2  | 3  | 0  | 0  | 85  | 3  | 8  | 0  | 147 | 0  | 0  | 12 | 2  | 1  | 0  |
| IV-05    | 92          | 2  | 11  | 2  | 5  | 0  | 1  | 4  | 0  | 0  | 111 | 6  | 9  | 1  | 130 | 0  | 0  | 8  | 3  | 4  | 0  |
| IV-06    | 90          | 3  | 14  | 1  | 3  | 1  | 1  | 1  | 0  | 0  | 127 | 4  | 11 | 1  | 132 | 0  | 0  | 7  | 3  | 2  | 1  |
| IE-01    | 106         | 17 | 8   | 4  | 1  | 1  | 2  | 1  | 1  | 0  | 33  | 3  | 2  | 2  | 127 | 1  | 0  | 10 | 0  | 2  | 0  |
| IE-02    | 111         | 10 | 3   | 5  | 2  | 2  | 1  | 0  | 0  | 0  | 25  | 1  | 3  | 1  | 125 | 0  | 0  | 12 | 0  | 1  | 1  |
| IE-03    | 143         | 14 | 4   | 3  | 2  | 0  | 1  | 0  | 0  | 0  | 20  | 1  | 2  | 1  | 114 | 1  | 0  | 6  | 1  | 4  | 1  |
| IE-04    | 92          | 8  | 5   | 2  | 2  | 1  | 1  | 1  | 0  | 0  | 24  | 2  | 1  | 2  | 110 | 1  | 0  | 11 | 0  | 5  | 0  |
| IE-05    | 81          | 9  | 5   | 3  | 1  | 1  | 1  | 1  | 0  | 0  | 37  | 1  | 1  | 1  | 139 | 0  | 0  | 14 | 1  | 1  | 0  |
| BE-01    | 106         | 11 | 6   | 3  | 2  | 1  | 2  | 1  | 1  | 1  | 35  | 1  | 2  | 1  | 159 | 0  | 0  | 15 | 1  | 3  | 1  |
| BE-02    | 107         | 22 | 7   | 3  | 2  | 2  | 1  | 0  | 0  | 0  | 32  | 1  | 2  | 1  | 162 | 1  | 0  | 17 | 1  | 2  | 0  |
| BE-03    | 128         | 10 | 4   | 7  | 3  | 2  | 2  | 0  | 0  | 0  | 30  | 1  | 1  | 1  | 160 | 1  | 0  | 18 | 1  | 2  | 0  |
| BA-01    | 71          | 2  | 0   | 2  | 0  | 1  | 3  | 31 | 1  | 4  | 3   | 1  | 1  | 0  | 10  | 0  | 0  | 1  | 1  | 1  | 0  |
| BA-02    | 75          | 5  | 0   | 1  | 1  | 1  | 4  | 51 | 1  | 5  | 4   | 2  | 3  | 1  | 23  | 0  | 0  | 3  | 1  | 1  | 0  |
| BA-03    | 92          | 3  | 0   | 1  | 1  | 0  | 3  | 39 | 1  | 7  | 7   | 2  | 1  | 0  | 20  | 0  | 0  | 1  | 1  | 1  | 0  |

YW – *F. orientalis* wild Yakutia; BW – *F. orientalis* wild Buryatia; BC – *F. orientalis* cultivated Yakutia; IV – *F. viridis* wild Irkutsk; IE – *F. vesca* wild Irkutsk; BE – *F. vesca* wild Buryatia; BA – *F. ananasa* cultivated Buryatia.
